# Supplementary material
Source: Springer Nature journal article supplement (https://www.springermedizin.de/resource/supplementary/12958_2003_107_MOESM1_ESM.pdf/9566134)
Supplement: MOESM1 [file 9566134]

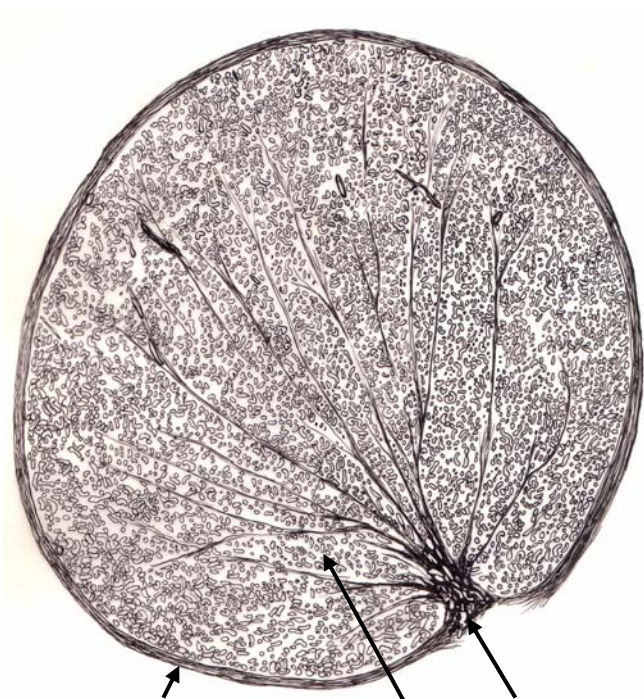

Tunica albuginea  
 Lobulus testis  
 Rete testis

**A**

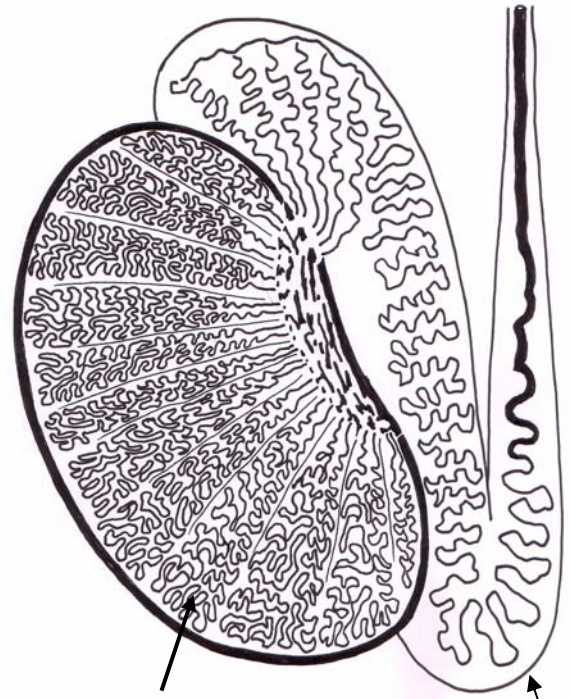

Lobulus testis = loop of seminiferous tubule  
 Epididymis

**B**

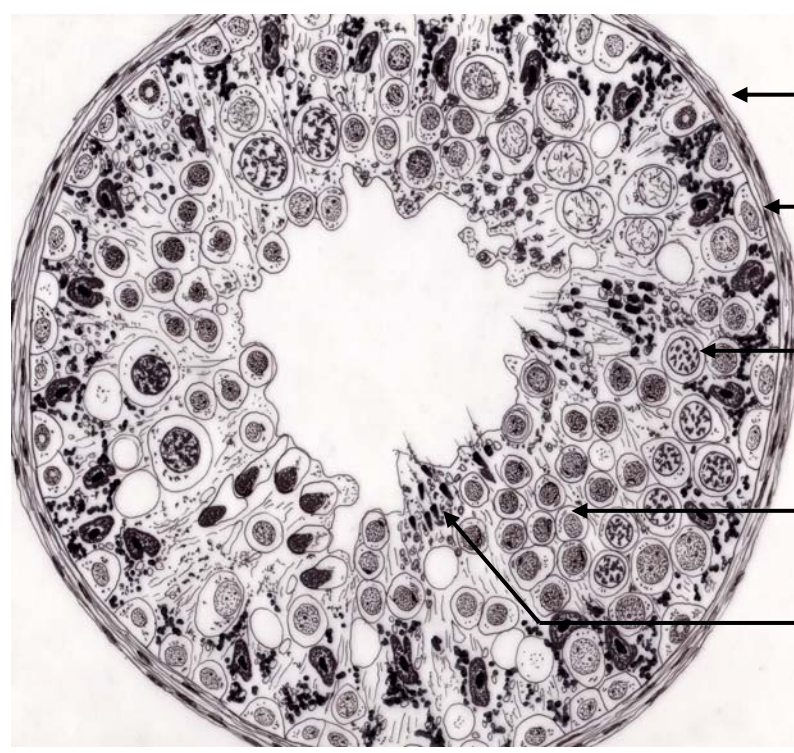

Peritubular tissue  
 (Lamina propria of seminiferous tubule)  
 Spermatogonium  
 Primary spermatocyte  
 Immature spermatids  
 Mature spermatids

**C**
